# Supplementary material for: A novel ionically crosslinked gel polymer electrolyte as an ion transport layer for high-performance electrochromic devices
Source: Royal Society of Chemistry journal article supplement (doi:10.1039/c9tc00621d), 2019-01-01
Supplement: c9tc00621d1.pdf [file c9tc00621d1.pdf]

## Supporting information

### A novel ionically crosslinked gel polymer electrolyte as ion transport layer for high performance electrochromic devices

Wanyu Chen, Caizhi Zhu, Le Guo, MengYing Yan, Bo Zhu, Chenjie Qi, Siyuan Liu, He Zhang, Lili Wu, Yong Peng \*

We studied the cycle durability by applying repetitive positive and negative bias of 2.30 V on PECD for 200 cycles. The transmittance difference of PECD under bleached and colored states is 61% before applying repetitive voltage bias. After 50 cycles, the difference reduces to 58.4%, which reduces only 2.6% of its initial value.

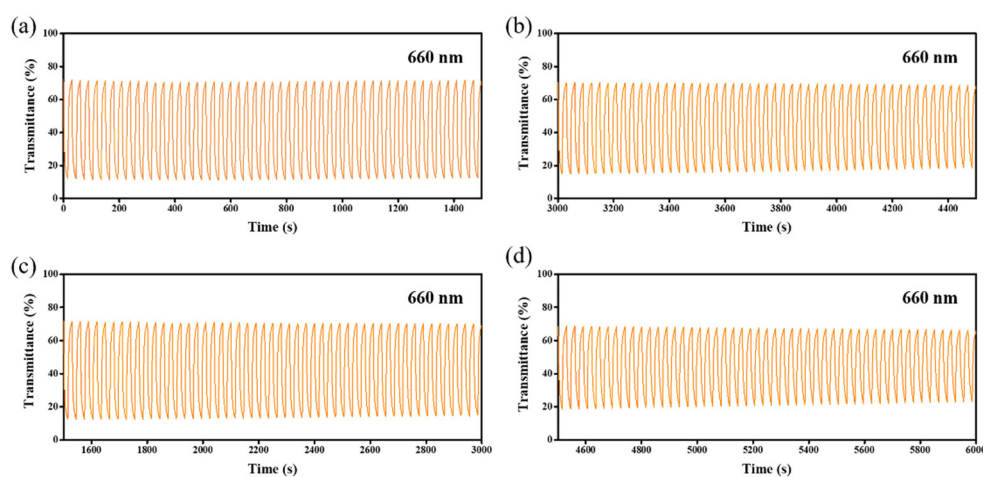

Fig. S1 In situ optical response of PECD measured at 660 nm. (a) 1-50th cycles (b) 51-100th cycles (c) 101-150th cycles (d) 151-200th cycles. Potential: 2.30 V, cycling time: 30 s.

The video of PECD in coloring and bleaching processes is also provided.
